# Supplementary material for: Exploitation of HPLC Analytical Method for Simultaneous Determination of Six Principal Unsaturated Fatty Acids in Oviductus Ranae Based on Quantitative Analysis of Multi-Components by Single-Marker (QAMS)
Source: PubMed Central journal article supplement (PMC7831056; doi:10.3390/molecules26020479), 2021-01-18
Supplement: molecules-26-00479-s001.pdf [file molecules-26-00479-s001.pdf]

# Exploitation of HPLC Analytical Method for Simultaneous Determination of Six Principal Unsaturated Fatty Acids in *Oviductus Ranae* based on Quantitative Analysis of Multi-components by Single-marker (QAMS)

Shihan Wang <sup>1,\*</sup>, Yuanshuai Gan <sup>2</sup>, Hong Kan <sup>1</sup>, Xinxin Mao <sup>1</sup> and Yongsheng Wang <sup>2,\*</sup>

<sup>1</sup> College of Chinese Medicine Materials, Jilin Agricultural University, Changchun, Jilin 130118, China; shihanw@jlau.edu.cn (S.W.); kanhong@vip.163.com (H.K.); maomaoheniunai@126.com (X.M.)

<sup>2</sup> School of Pharmaceutical Sciences, Jilin University, Changchun, Jilin 130021, China; ganys18@mails.jlu.edu.cn (Y.G.); wys@jlu.edu.cn (Y.W.)

\* Correspondence: shihanw@jlau.edu.cn (S.W.); wys@jlu.edu.cn (Y.W.)

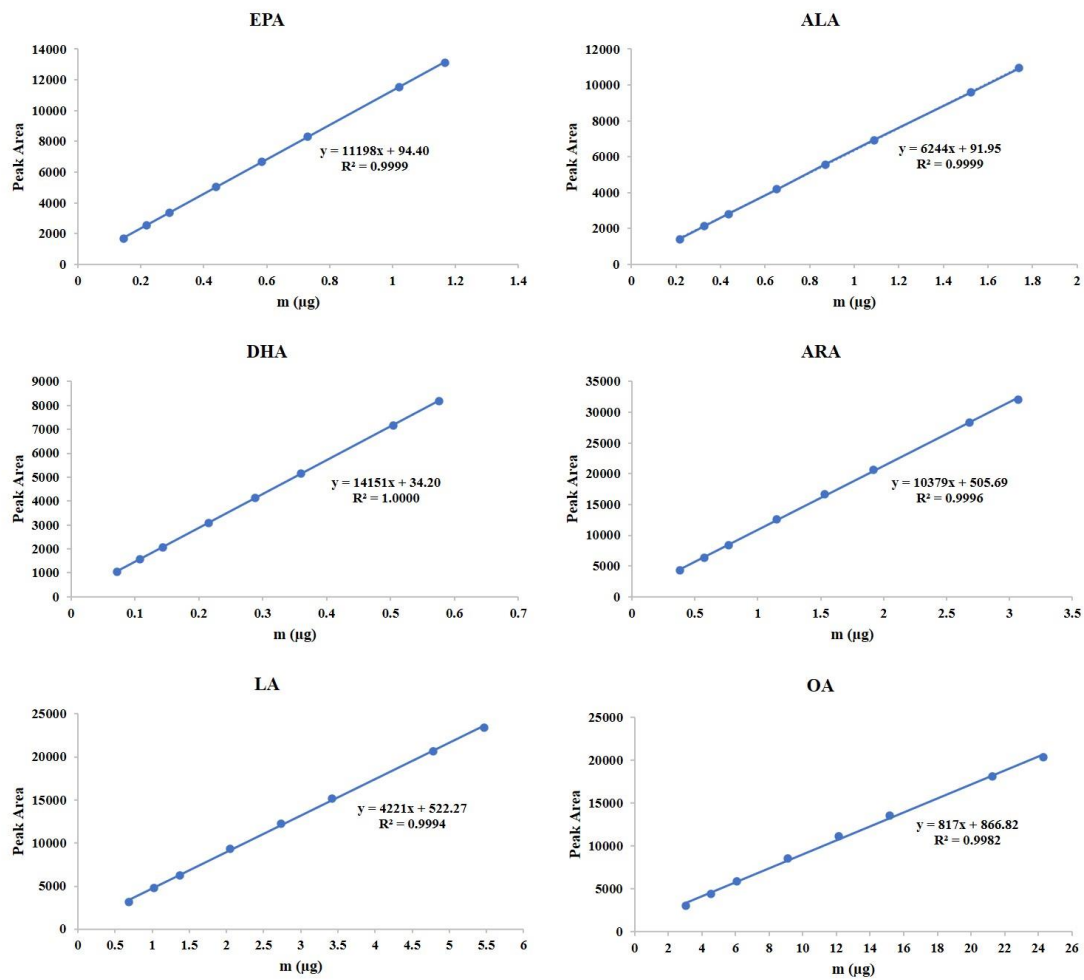

**Figure S1.** The calibration curve of unsaturated fatty acid (UFA) standards.

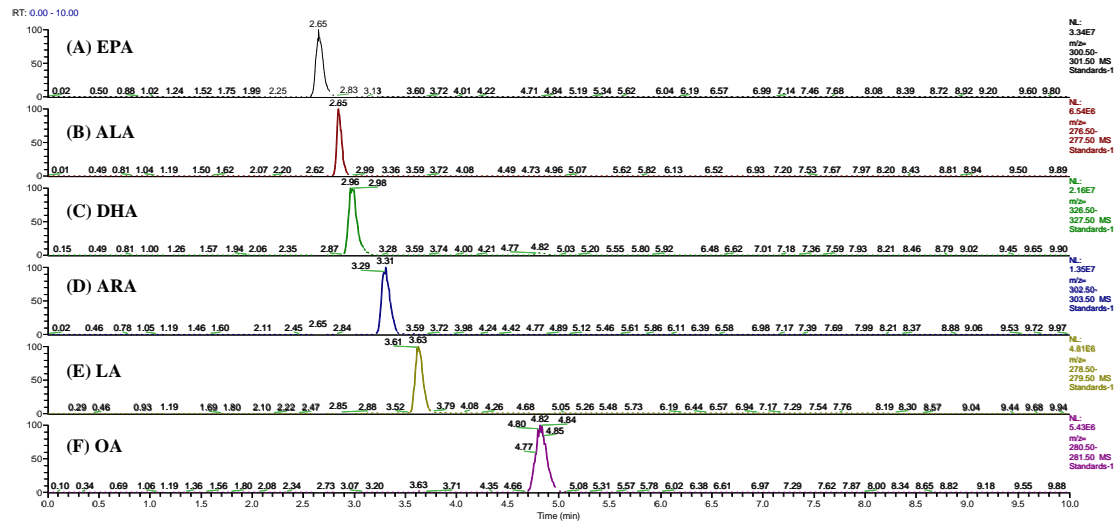

**Figure S2.** The extracted ion chromatograms (EICs) of unsaturated fatty acid (UFA) standards.

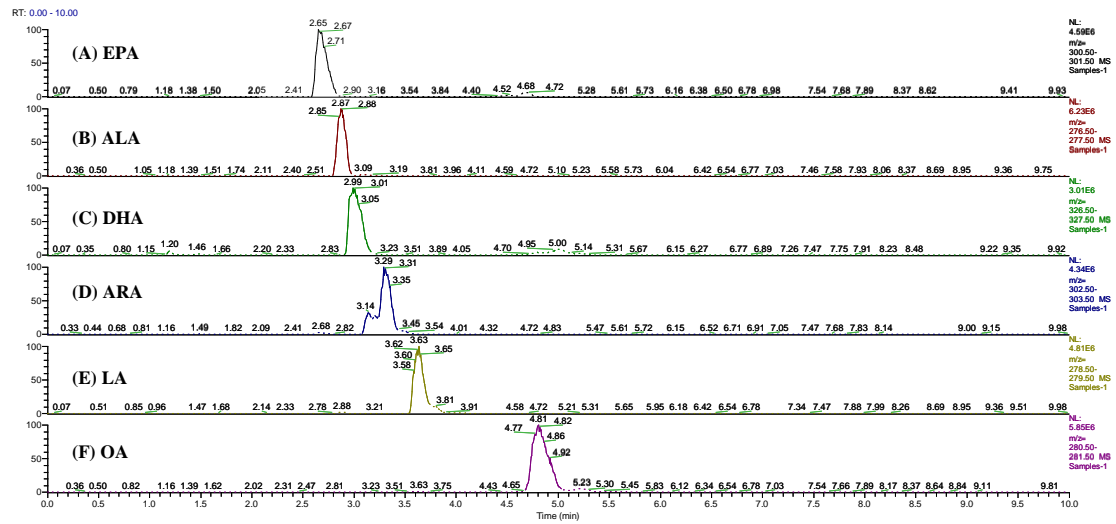

Figure S3. The extracted ion chromatograms (EICs) of *Oviductus Ranae* sample.

**Table S1.** The response results for S/N (Delta 1) and means (Delta 2)

| <b>Source</b>  | <b>HPLC Instruments</b> | <b>Chromatographic Columns</b> |
|----------------|-------------------------|--------------------------------|
| S/N (Delta 1)  | 0.059                   | 0.056                          |
| Rank           | 1                       | 2                              |
| Mean (Delta 2) | 0.007                   | 0.021                          |
| Rank           | 2                       | 1                              |

**Table S2.** The results of analysis of variance (ANOVA) for S/N and means

| <b>Source</b>           | <b>DF</b> | <b>p-value (S/N)</b> | <b>p-value (Mean)</b> |
|-------------------------|-----------|----------------------|-----------------------|
| HPLC Instruments        | 2         | 0.535                | 0.843                 |
| Chromatographic Columns | 2         | 0.565                | 0.291                 |

**Table S3.** The relative error between ESM and QAMS results of 15 batches of *Oviductus Ranae* samples

| <b>Samples</b> | <b>LA</b> | <b>EPA (%)</b> | <b>ALA (%)</b> | <b>DHA (%)</b> | <b>ARA (%)</b> | <b>OA (%)</b> |
|----------------|-----------|----------------|----------------|----------------|----------------|---------------|
| S1             | N/A       | -0.50          | -0.38          | -0.11          | 0.17           | 0.73          |
| S2             | N/A       | -0.46          | -0.40          | -0.23          | 0.13           | 0.73          |
| S3             | N/A       | -0.52          | -0.35          | -0.27          | 0.15           | 0.73          |
| S4             | N/A       | -0.50          | -0.37          | -0.20          | 0.13           | 0.73          |
| S5             | N/A       | -0.50          | -0.37          | -0.29          | 0.13           | 0.73          |
| S6             | N/A       | -0.48          | -0.35          | -0.18          | 0.14           | 0.73          |
| S7             | N/A       | -0.50          | -0.36          | -0.23          | 0.13           | 0.73          |
| S8             | N/A       | -0.50          | -0.38          | -0.18          | 0.13           | 0.73          |
| S9             | N/A       | -0.49          | -0.40          | -0.16          | 0.10           | 0.73          |
| S10            | N/A       | -0.54          | -0.38          | -0.13          | 0.14           | 0.73          |
| S11            | N/A       | -0.48          | -0.38          | -0.17          | 0.11           | 0.73          |
| S12            | N/A       | -0.48          | -0.37          | -0.15          | 0.14           | 0.73          |
| S13            | N/A       | -0.53          | -0.37          | -0.18          | 0.15           | 0.73          |
| S14            | N/A       | -0.51          | -0.36          | -0.22          | 0.12           | 0.73          |
| S15            | N/A       | -0.51          | -0.36          | -0.17          | 0.14           | 0.73          |

**Table S4.** The details of the HPLC chromatograph used in this work

| <b>Models</b> | <b>Detector</b>            | <b>Workstation</b>  |
|---------------|----------------------------|---------------------|
| Agilent-UVD   | Ultraviolet detector       | Agilent ChemStation |
| Agilent-DAD   | Diode array detector (DAD) | Agilent ChemStation |
| Waters-E2695  | Ultraviolet detector       | Empower 3           |



**Table S5.** The details of the chromatographic columns used in this work

| <b>Brand</b> | <b>Type</b> | <b>Length<br/>(mm)</b> | <b>Aperture<br/>(Å)</b> | <b>Carbon<br/>Load<br/>(%)</b> | <b>Surface<br/>Area<br/>(m<sup>2</sup>/g)</b> | <b>End<br/>Capping</b> |
|--------------|-------------|------------------------|-------------------------|--------------------------------|-----------------------------------------------|------------------------|
| Agilent      | TC-C18      | 250×4.6                | 130                     | 12                             | 300                                           | Yes                    |
| Waters       | XBridge-C18 | 250×4.6                | 135                     | 18                             | 185                                           | Yes                    |
| Venusil      | MP-C18      | 250×4.6                | 100                     | 18                             | 380                                           | Yes                    |
